# Supplementary material
Source: PubMed Central journal article supplement (PMC4542236)
Supplement: AEM.01199-15_zam999116568so1.pdf [file AEM.01199-15_zam999116568so1.pdf]

| Primers       | Primer sequences                  |
|---------------|-----------------------------------|
| <i>kat</i> 3F | 5'-GGAGCGTGACATTCGAGGAT-3'        |
| <i>kat</i> 3R | 5'- GACCCGTCCAGAAATCCCAG-3'       |
| <i>iles</i> F | 5'-TTAGAAAAAATAAAGGTAACGAAACAT-3' |
| <i>iles</i> R | 5'- GTAAACCATGTGTATCCCAACCTG-3'   |

**TABLE S1** Primers for real-time qPCR. Primers *iles* F and R was designed for reference gene *iles*.

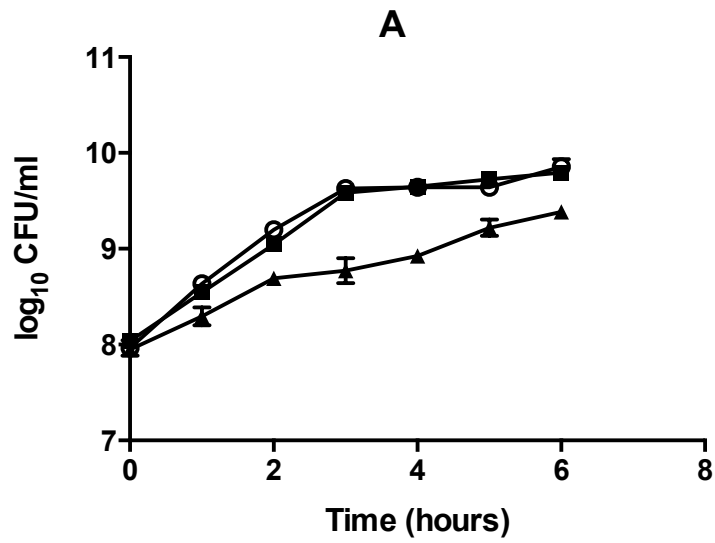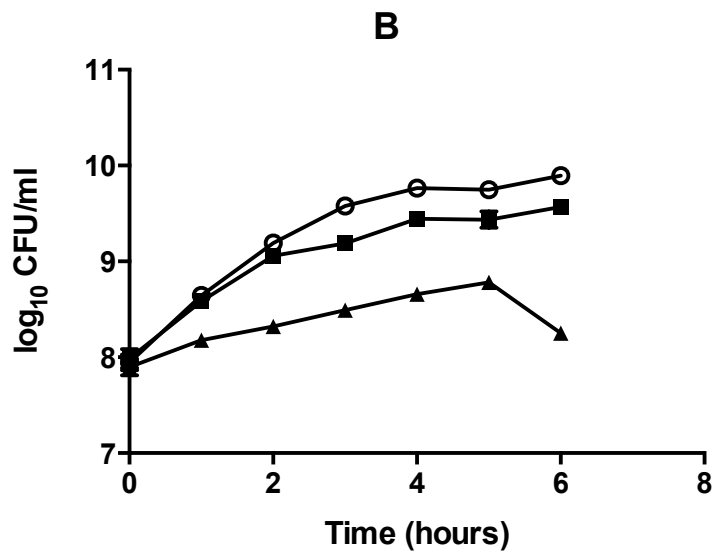

**FIG S1** The effect of ethanol and PBN on *S. aureus* growth. The growth of *S. aureus* with (filled square) and without (circle) the addition of 2% (v/v) ethanol and with both of 2% ethanol and 40mM PBN (filled triangle) in BHI (A) or TSB (B) medium was monitored by CFU/ml.

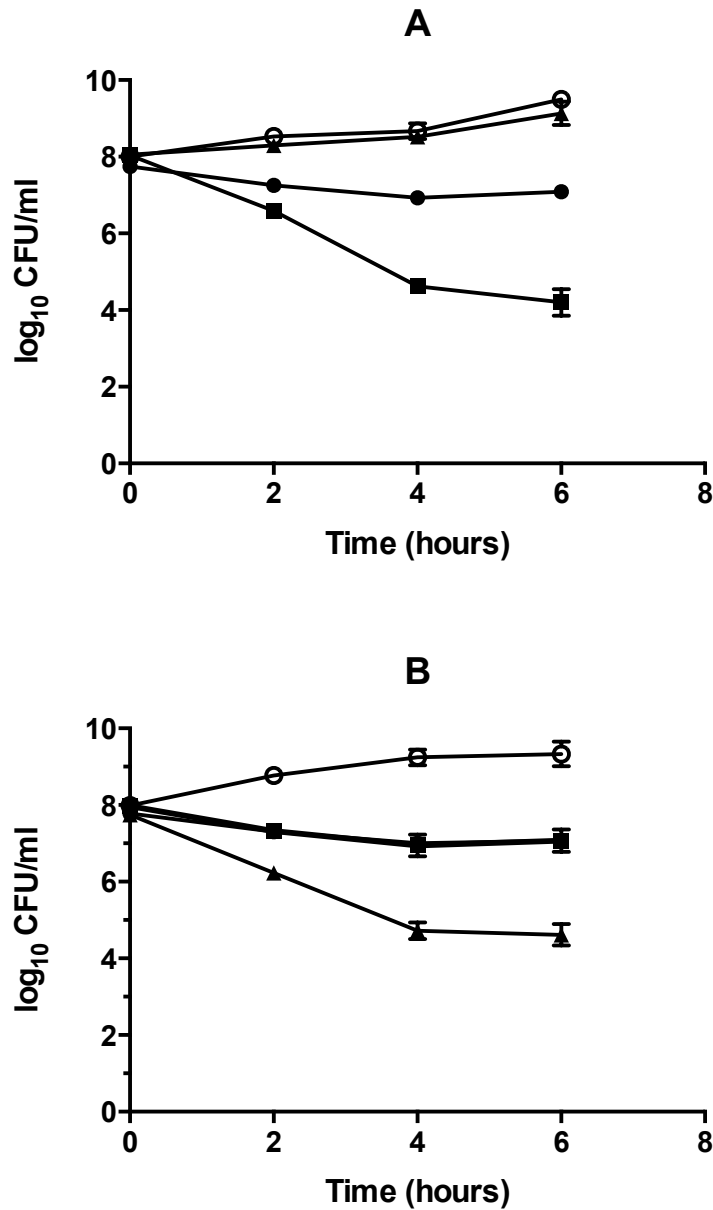

**FIG S2** The effect of hydrogen peroxide and antibiotics on *S. aureus*. The growth of *S. aureus* treated with 6 mM hydrogen peroxide (filled triangle), 2.5  $\mu\text{g}/\text{ml}$  vancomycin (closed circle), 0.4  $\mu\text{g}/\text{ml}$  ciprofloxacin (filled square) and without any treatment (circle) in BHI (A) or TSB (B) medium are shown in term of the changes of CFU/ml. 2% (v/v) ethanol and 40mM PBN are present in all samples.
